# Supplementary material
Source: publisher figshare collection journal article supplement (https://acs.figshare.com/ndownloader/files/4116625)
Supplement: Supplementary file 1 [file 4116625]

# Supporting information: Sodium promoter inducing a phase change in a palladium catalyst

N. Seriani

*The Abdus Salam International Centre for Theoretical Physics,  
Strada Costiera 11, 34151 Trieste, Italy*

October 8, 2012

## **Supporting information.**

In the Supporting Information, the cell parameters and atomic coordinates for the bulk phases considered in the paper are reported: cubic  $\text{NaPd}_3\text{O}_4$ , tetragonal  $\text{NaPd}_3\text{O}_4$ ,  $\text{NaPd}_3\text{O}_3$ , and  $\text{NaPd}_3\text{O}_6$ . A diagram of the free energy of formation of the bulk phases calculated with LDA is reported. The projected density of states (PDOS) of the  $\text{NaPd}_3\text{O}_4(100)$  surface with dissociatively adsorbed methane is shown. Finally, the electronic state localized on the  $\text{O}_{\text{surf}}\text{-CH}_3$  bond is shown.

Table 1: Cell parameters (in Å) for the cubic NaPd<sub>3</sub>O<sub>4</sub>.

|             |      |      |      |
|-------------|------|------|------|
| $\bar{a}_1$ | 5.80 | 0.00 | 0.00 |
| $\bar{a}_2$ | 0.00 | 5.80 | 0.00 |
| $\bar{a}_3$ | 0.00 | 0.00 | 5.80 |

Table 2: Atomic positions (in Å) for the cubic NaPd<sub>3</sub>O<sub>4</sub>.

|    |      |      |      |    |      |      |      |    |      |      |      |    |      |      |      |
|----|------|------|------|----|------|------|------|----|------|------|------|----|------|------|------|
| Na | 0.00 | 0.00 | 0.00 | Na | 2.90 | 2.90 | 2.90 | Pd | 1.45 | 2.90 | 0.00 | Pd | 4.35 | 2.90 | 0.00 |
| Pd | 2.90 | 0.00 | 1.45 | Pd | 2.90 | 0.00 | 4.35 | Pd | 0.00 | 1.45 | 2.90 | Pd | 0.00 | 4.35 | 2.90 |
| O  | 1.45 | 1.45 | 1.45 | O  | 4.35 | 1.45 | 1.45 | O  | 1.45 | 4.35 | 1.45 | O  | 4.35 | 4.35 | 1.45 |
| O  | 1.45 | 1.45 | 4.35 | O  | 4.35 | 1.45 | 4.35 | O  | 1.45 | 4.35 | 4.35 | O  | 4.35 | 4.35 | 4.35 |

Table 3: Cell parameters (in Å) for the tetragonal NaPd<sub>3</sub>O<sub>4</sub>.

|             |      |       |      |
|-------------|------|-------|------|
| $\bar{a}_1$ | 6.53 | -0.01 | 0.00 |
| $\bar{a}_2$ | 0.00 | 3.07  | 0.00 |
| $\bar{a}_3$ | 0.00 | 0.00  | 5.57 |

Table 4: Atomic positions (in Å) for the tetragonal NaPd<sub>3</sub>O<sub>4</sub>.

|    |       |      |      |    |       |      |      |    |      |       |      |    |      |      |      |
|----|-------|------|------|----|-------|------|------|----|------|-------|------|----|------|------|------|
| Na | 1.61  | 1.52 | 2.80 | Pd | -0.26 | 0.00 | 0.01 | Pd | 3.47 | -0.01 | 0.01 | Pd | 4.87 | 1.53 | 2.80 |
| O  | -0.16 | 1.53 | 1.38 | O  | -0.16 | 1.53 | 4.21 | O  | 3.37 | 1.53  | 1.38 | O  | 3.37 | 1.53 | 4.21 |

Table 5: Cell parameters (in Å) for NaPd<sub>3</sub>O<sub>3</sub>.

|             |       |       |      |
|-------------|-------|-------|------|
| $\bar{a}_1$ | 11.53 | −0.01 | 1.18 |
| $\bar{a}_2$ | 0.00  | 3.04  | 0.00 |
| $\bar{a}_3$ | 0.56  | 0.00  | 5.86 |

Table 6: Atomic positions (in Å) for NaPd<sub>3</sub>O<sub>3</sub>.

|    |      |       |       |    |      |       |      |    |       |      |       |    |       |      |      |
|----|------|-------|-------|----|------|-------|------|----|-------|------|-------|----|-------|------|------|
| Na | 0.57 | 0.00  | 2.32  | Na | 6.61 | −0.01 | 2.41 | Pd | −0.04 | 0.00 | −0.52 | Pd | 3.93  | 0.00 | 1.21 |
| Pd | 7.75 | −0.01 | −0.29 | Pd | 3.00 | 1.51  | 4.92 | Pd | 9.26  | 1.51 | 2.87  | O  | −0.44 | 1.52 | 0.82 |
| O  | 1.01 | 1.52  | 4.04  | O  | 4.74 | 1.51  | 2.43 | O  | 3.85  | 1.51 | 5.82  | O  | 7.99  | 1.51 | 1.09 |
| O  | 7.69 | 1.51  | 4.25  |    |      |       |      |    |       |      |       |    |       |      |      |

Table 7: Cell parameters (in Å) for NaPd<sub>3</sub>O<sub>6</sub>.

|             |      |       |      |
|-------------|------|-------|------|
| $\bar{a}_1$ | 4.72 | −2.73 | 0.02 |
| $\bar{a}_2$ | 4.72 | 2.74  | 0.00 |
| $\bar{a}_3$ | 0.00 | −0.03 | 6.06 |

Table 8: Atomic positions (in Å) for NaPd<sub>3</sub>O<sub>6</sub>.

|    |      |       |       |    |      |       |       |    |      |      |      |    |      |       |       |
|----|------|-------|-------|----|------|-------|-------|----|------|------|------|----|------|-------|-------|
| Na | 4.78 | −0.90 | 2.76  | Pd | 0.07 | −0.03 | −0.01 | Pd | 3.19 | 0.01 | 0.00 | Pd | 6.38 | 0.02  | 0.00  |
| O  | 1.59 | 0.95  | 1.03  | O  | 4.78 | 0.85  | 1.04  | O  | 7.98 | 0.95 | 1.05 | O  | 1.65 | −0.92 | −1.03 |
| O  | 4.79 | −0.91 | −1.01 | O  | 7.93 | −0.91 | −1.02 |    |      |      |      |    |      |       |       |

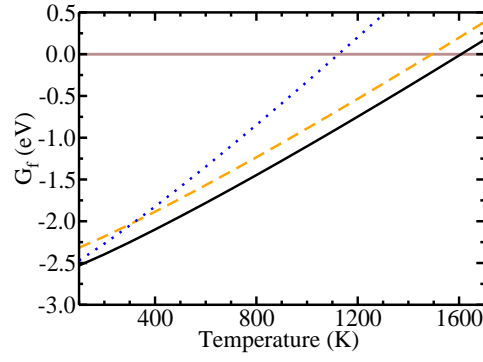

Figure 1: Free energies of formation of sodium-palladium oxides with respect to  $\text{NaPd}_3$  and the oxygen gas at a pressure of 1 atm and temperatures between 100 K and 1700 K, calculated with LDA. Brown solid horizontal line:  $\text{NaPd}_3$ ; black solid line: cubic  $\text{NaPd}_3\text{O}_4$ ; orange dashed line: tetragonal  $\text{NaPd}_3\text{O}_4$ ; blue dotted line:  $\text{NaPd}_3\text{O}_6$ .

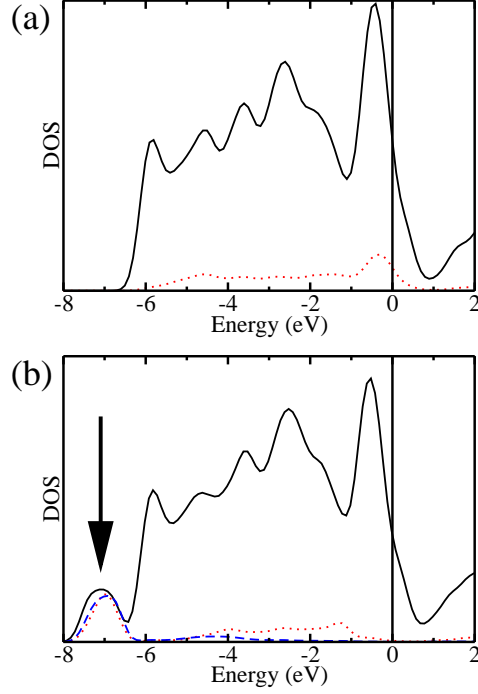

Figure 2: Density of states (DOS) of the  $\text{NaPd}_3\text{O}_4(100)$  surface. (a) Clean surface; (b) surface with dissociatively adsorbed methane. Black line: total DOS; red dotted line: projected DOS (PDOS) on the 2p states of the surface oxygen forming the bond to the  $\text{CH}_3$ ; blue dashed line: projected DOS on the 2p states of the C atom. The vertical black line corresponds to the Fermi energy. The PDOS of the 2p states have been multiplied by 3 to put them on the same scale as the total DOS. The large arrow indicates the new state appearing at the surface upon adsorption, mainly composed of 2p states of the surface oxygen and of the C atom, building a covalent bond. The electronic state corresponding to this peak is shown in Fig. 3S.

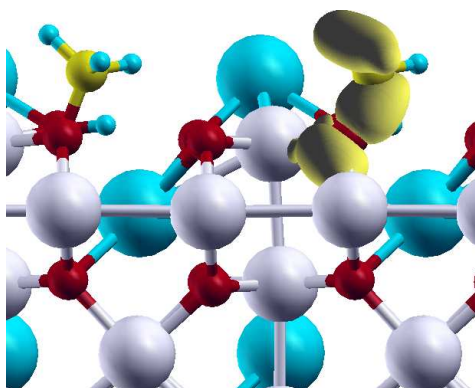

Figure 3: The electronic state relative to the peak shown by the arrow in Fig. 2S. Grey balls: palladium atoms; red balls: oxygen atoms; light blue atoms: sodium; yellow atoms: carbon; small light blue atoms: hydrogen. The yellow cloud is an isosurface of the surface state that is formed upon dissociative adsorption of methane. Both the spatial orientation and the PDOS of Fig. 2S suggest that this is mainly formed by the 2p states of oxygen and carbon.
